# Supplementary material for: Using high throughput microtissue culture to study the difference in prostate cancer cell behavior and drug response in 2D and 3D co-cultures
Source: Springer Nature journal article supplement (doi:10.1186/s12885-018-4473-8), 2018-05-24
Supplement: MOESM1 [file 15790330]

## Additional file 1

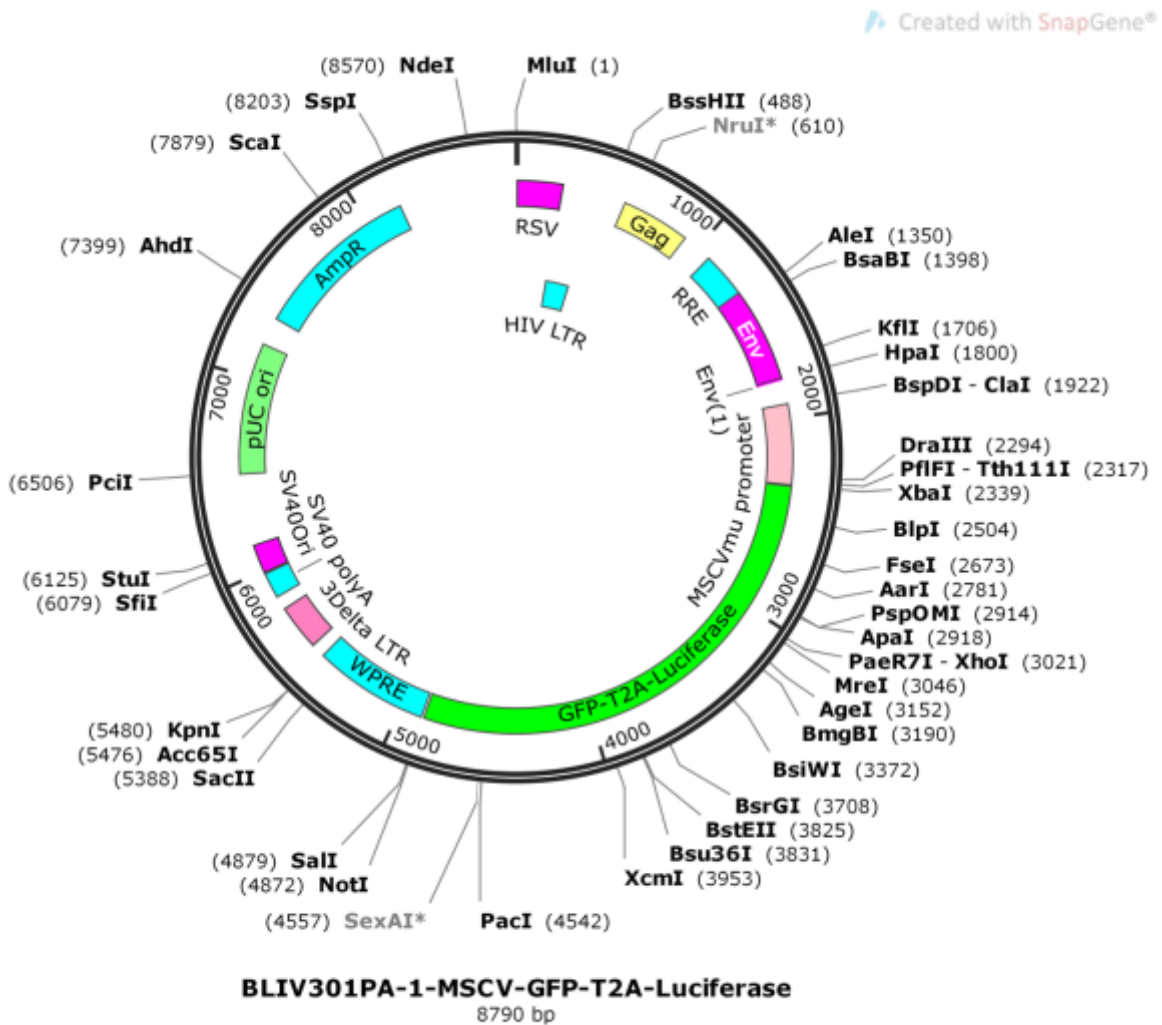

**Figure S1.** Restriction map of the plasmid used in the transduction and manufacture of LUC-GFP expressing C42B PCa cells. Plasmid was designed by System Biosciences (Bioluminescence Imaging Vectors, BLIV).
